# Supplementary material for: Transient and flexible polymer memristors utilizing full-solution processed polymer nanocomposites
Source: Royal Society of Chemistry journal article supplement (doi:10.1039/c8nr04041a), 2018-01-01
Supplement: c8nr04041a1.pdf [file c8nr04041a1.pdf]

Electronic Supplementary Material (ESI) for Nanoscale.  
This journal is © The Royal Society of Chemistry 2017

---

## Supporting information

### Transient and Flexible Polymer Memristors Utilizing Full-Solution

#### Processed Polymer Nanocomposites

Zhe Zhou<sup>a</sup>, Huiwu Mao<sup>a</sup>, Xiangjing Wang<sup>a</sup>, Tao Sun<sup>a</sup>, Qing Chang<sup>a</sup>, Yingying Chen<sup>a</sup>, Fei Xiu<sup>a</sup>,  
Zhengdong Liu<sup>a</sup>, Juqing Liu<sup>\*a</sup>, and Wei Huang<sup>\*a,b,c</sup>

<sup>a</sup>Key Laboratory of Flexible Electronics (KLOFE) & Institute of Advanced Materials (IAM), Nanjing Tech University (NanjingTech), 30 South Puzhu Road, Nanjing 211816, China.

E-mail: iamjqliu@njtech.edu.cn; wei-huang@njtech.edu.cn

<sup>b</sup> Key Laboratory for Organic Electronics and Information Displays & Institute of Advanced Materials (IAM), SICAM, Nanjing University of Posts & Telecommunications, 9 Wenyuan Road, Nanjing 210023, China

<sup>c</sup> Shaanxi Institute of Flexible Electronics (SIFE), Northwestern Polytechnical University (NPU), 127 West Youyi Road, Xi'an 710072, China.

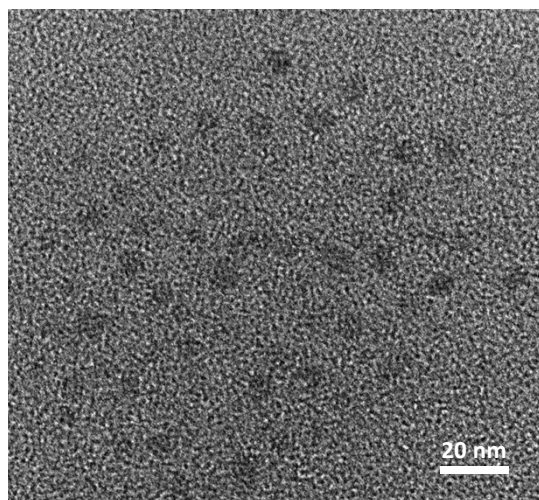

**Figure S1.** Transmission electron microscopy (TEM) image of synthesized spherical CA QDs.

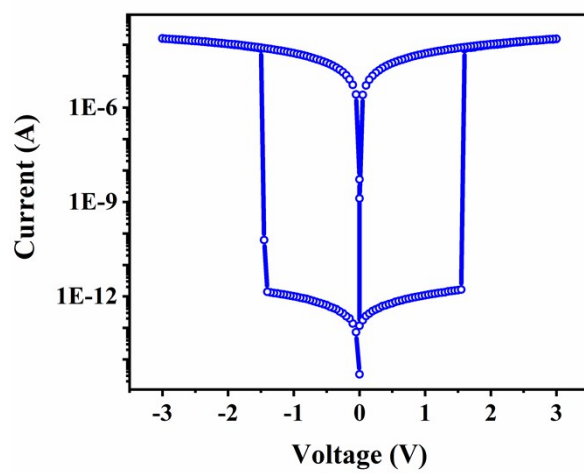

**Figure S2.** Current versus voltage (I-V) curves of memristor with an architecture of AgNW/AgNP-PVP/AgNW.

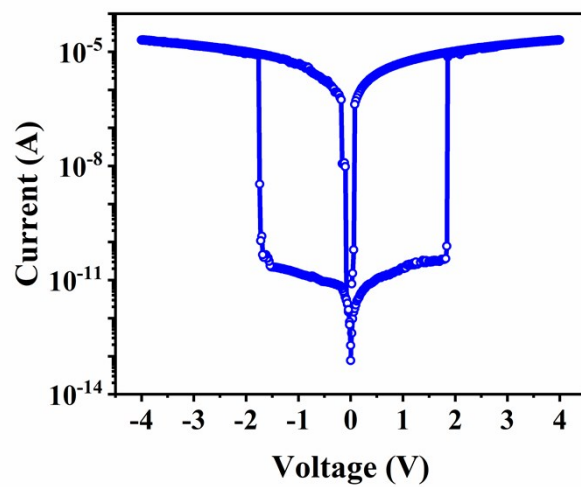

**Figure S3.** Current versus voltage (I-V) curves of memristor with an architecture of ITO/CA QD-PVP/Au.
